# Supplementary material for: Preparation of the Ru/HZSM-5 catalyst and its catalytic performance for the 2-pentanone hydrodeoxygenation reaction
Source: Royal Society of Chemistry journal article supplement (doi:10.1039/d1nj03504e), 2021-01-01
Supplement: d1nj03504e1.pdf [file d1nj03504e1.pdf]

## SUPPORTING INFORMATION

### Preparation of Ru/HZSM-5 catalyst and its catalytic performance for

#### 2-pentanone hydrodeoxygenation reaction

*Xi Xi<sup>a</sup>, Ye Yang<sup>a</sup>, Hualiang An<sup>\*a</sup>, Xinqiang Zhao<sup>\*a</sup> and Yanji Wang<sup>a</sup>*

*<sup>a</sup>Hebei Provincial Key Lab of Green Chemical Technology and Efficient Energy Saving, National Local Joint Laboratory of Energy-saving Process Integration and Resource Utilization in Chemical Industry, School of Chemical Engineering and Technology, Hebei University of Technology, Tianjin 300130, People's Republic of China, Email: zhaoxq@hebut.edu.cn; anhl@hebut.edu.com*

#### **Table of Contents**

1. *Analysis of different metal load on HZSM-5 by ICP (Table SI-1)*
2. *NH<sub>3</sub>-TPD analysis results of Ru/HZSM-5 catalysts with different Si/Al ratios (Table SI-2)*
3. *Py-IR analysis results of Ru/HZSM-5 catalysts with different Si/Al ratios (Figure. SI-1)*
4. *Relationship between grain size and calcination temperature (Figure. SI-2)*
5. *XRD characterization results of Ru/HZSM-5 prepared at different calcination temperatures (Figure. SI-3)*
6. *TG-DSC analysis of the used Ru/HZSM-5 (21) catalyst (Figure. SI-4)*

## 1. Analysis of different metal load on HZSM-5 by ICP

Table SI-1 ICP measurement results of metal content in different catalysts

| Catalyst  | Metal content/wt.%        |                            |
|-----------|---------------------------|----------------------------|
|           | (Theoretical calculation) | (Experimental measurement) |
| Pd/HZSM-5 | 2.0                       | 1.9                        |
| Pt/HZSM-5 | 2.0                       | 2.0                        |
| Ir/HZSM-5 | 2.0                       | 2.0                        |
| Ru/HZSM-5 | 2.0                       | 2.0                        |
| Ni/HZSM-5 | 5.0                       | 5.0                        |
| Co/HZSM-5 | 5.0                       | 4.9                        |
| Cu/HZSM-5 | 5.0                       | 5.0                        |

## 2. NH<sub>3</sub>-TPD analysis results of Ru/HZSM-5 catalysts with different Si/Al ratios

Table SI-2 Acid properties of Ru/HZSM-5 catalysts with different Si/Al ratio

| Catalyst            | NH <sub>3</sub> desorption peak at lower temperature |                                                        | NH <sub>3</sub> desorption peak at medium temperature |                                                          | NH <sub>3</sub> desorption peak at higher temperature |                                                          | Total acid amount/<br>$\mu\text{mol}\cdot\text{g}^{-1}$ |
|---------------------|------------------------------------------------------|--------------------------------------------------------|-------------------------------------------------------|----------------------------------------------------------|-------------------------------------------------------|----------------------------------------------------------|---------------------------------------------------------|
|                     | Peak top temperature/<br>$^{\circ}\text{C}$          | Weak acid amount/<br>$\mu\text{mol}\cdot\text{g}^{-1}$ | Peak top temperature/<br>$^{\circ}\text{C}$           | Strong acid amount/<br>$\mu\text{mol}\cdot\text{g}^{-1}$ | Peak top temperature/<br>$^{\circ}\text{C}$           | Strong acid amount/<br>$\mu\text{mol}\cdot\text{g}^{-1}$ |                                                         |
|                     | Ru/HZSM-5(21)                                        | 190.9                                                  | 319.2                                                 | 263.9                                                    | 231.6                                                 | 347.1                                                    |                                                         |
| Ru/HZSM-5(61)       | 184.6                                                | 130.4                                                  | —                                                     | —                                                        | 303.4                                                 | 194.3                                                    | 324.7                                                   |
| Ru/HZSM-5(130)      | 180.7                                                | 101.0                                                  | —                                                     | —                                                        | 283.3                                                 | 191.9                                                    | 292.9                                                   |
| Ru/HZSM-5(360)      | 162.1                                                | 26.5                                                   | —                                                     | —                                                        | 260.0                                                 | 75.3                                                     | 101.8                                                   |
| Ru/SiO <sub>2</sub> | 163.7                                                | 4.1                                                    | 256.8                                                 | 1.8                                                      | —                                                     | —                                                        | 5.9                                                     |
| Ru/ZrO <sub>2</sub> | 131.5                                                | 15.9                                                   | 277.9                                                 | 48.9                                                     | —                                                     | —                                                        | 64.8                                                    |
| Ru/TiO <sub>2</sub> | 134.7                                                | 21.2                                                   | 276.1                                                 | 75.4                                                     | —                                                     | —                                                        | 96.6                                                    |

## 3. Py-IR analysis results of Ru/HZSM-5 catalysts with different Si/Al ratios

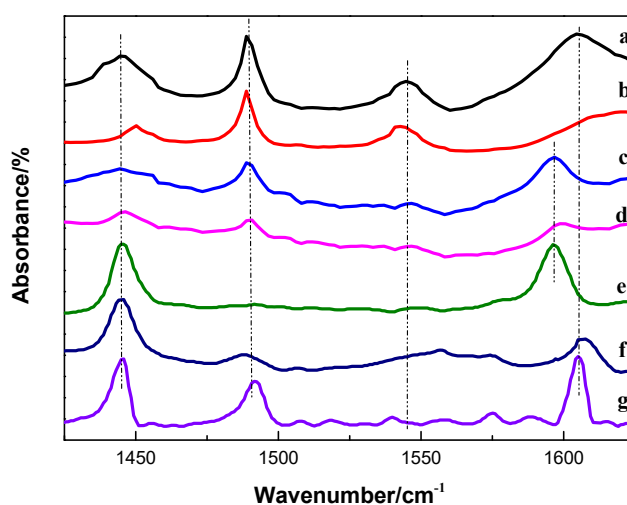

Fig. SI-1 Py-IR spectra of Ru/HZSM-5 with different Si/Al ratios  
a: HZSM-5(21); b: HZSM-5(60); c: HZSM-5(130); d: HZSM-5(360); e: SiO<sub>2</sub>; f: ZrO<sub>2</sub>; g: TiO<sub>2</sub>

#### 4. Relationship between grain size and calcination temperature

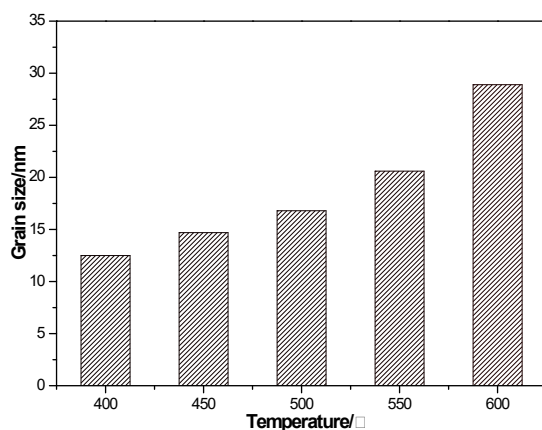

Fig. SI-2 Relationship between grain size and calcination temperature

#### 5. XRD characterization results of Ru/HZSM-5 prepared at different calcination temperatures

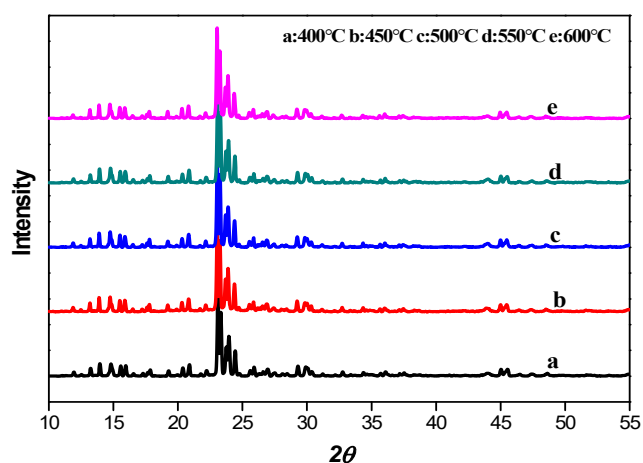

Fig. SI-3 XRD patterns of Ru/HZSM-5 prepared at different calcination temperatures

#### 6. TG-DSC analysis of the used Ru/HZSM-5 (21) catalyst

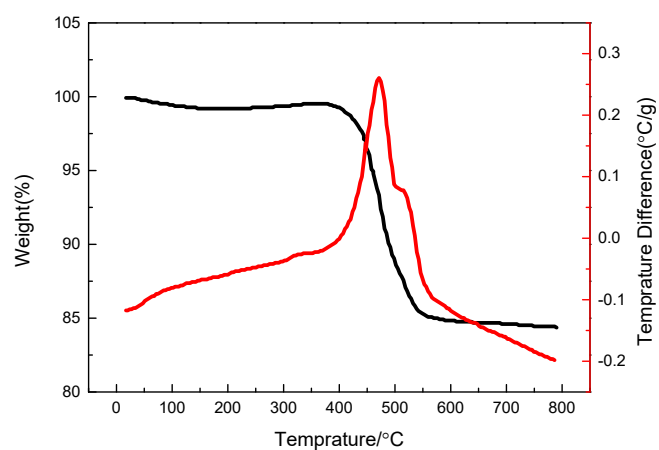

Fig. SI-4 TG-DSC analysis of the used Ru/HZSM-5 (21) catalyst
